# Supplementary material for: Fecal Microbiota Restoration Modulates the Microbiome in Inflammation-Driven Colorectal Cancer
Source: MDPI journal article supplement (doi:10.3390/cancers15082260), 2023-04-12

# Supplemental Figures

## Supplementary Figure S1A

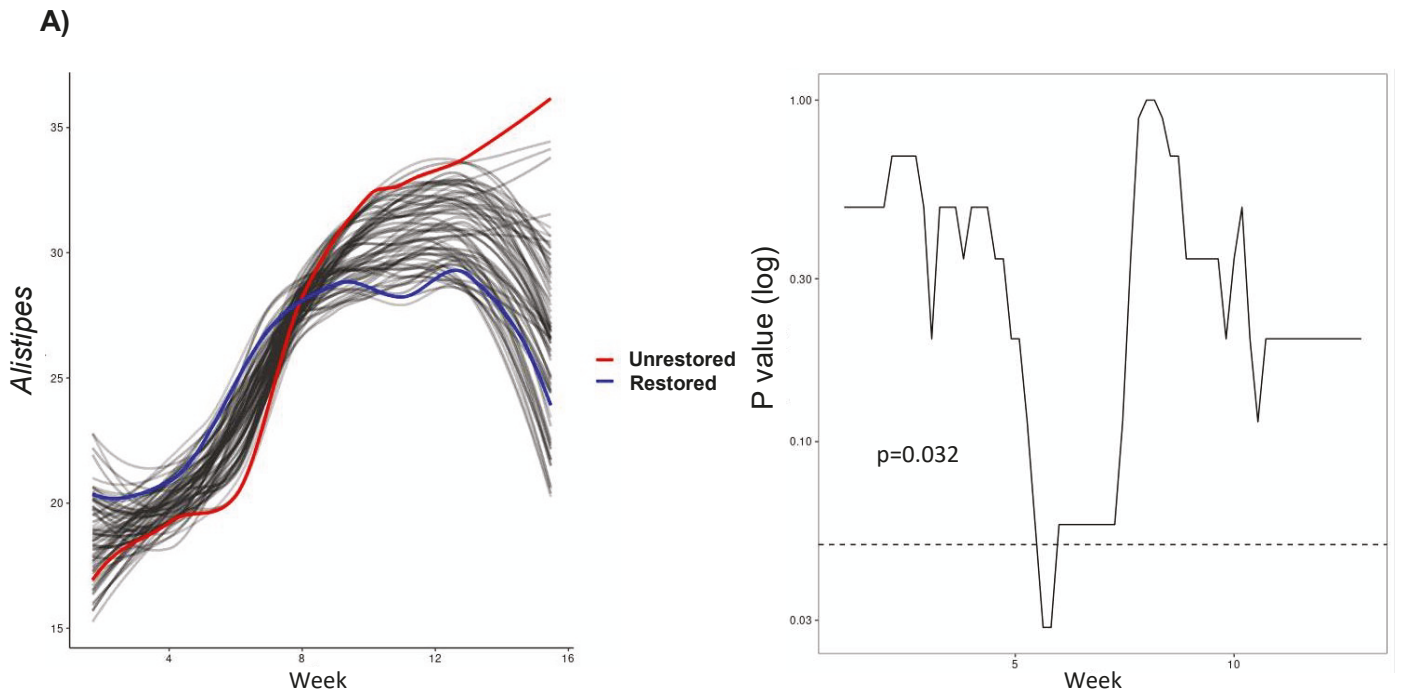

## Supplementary Figure S1B

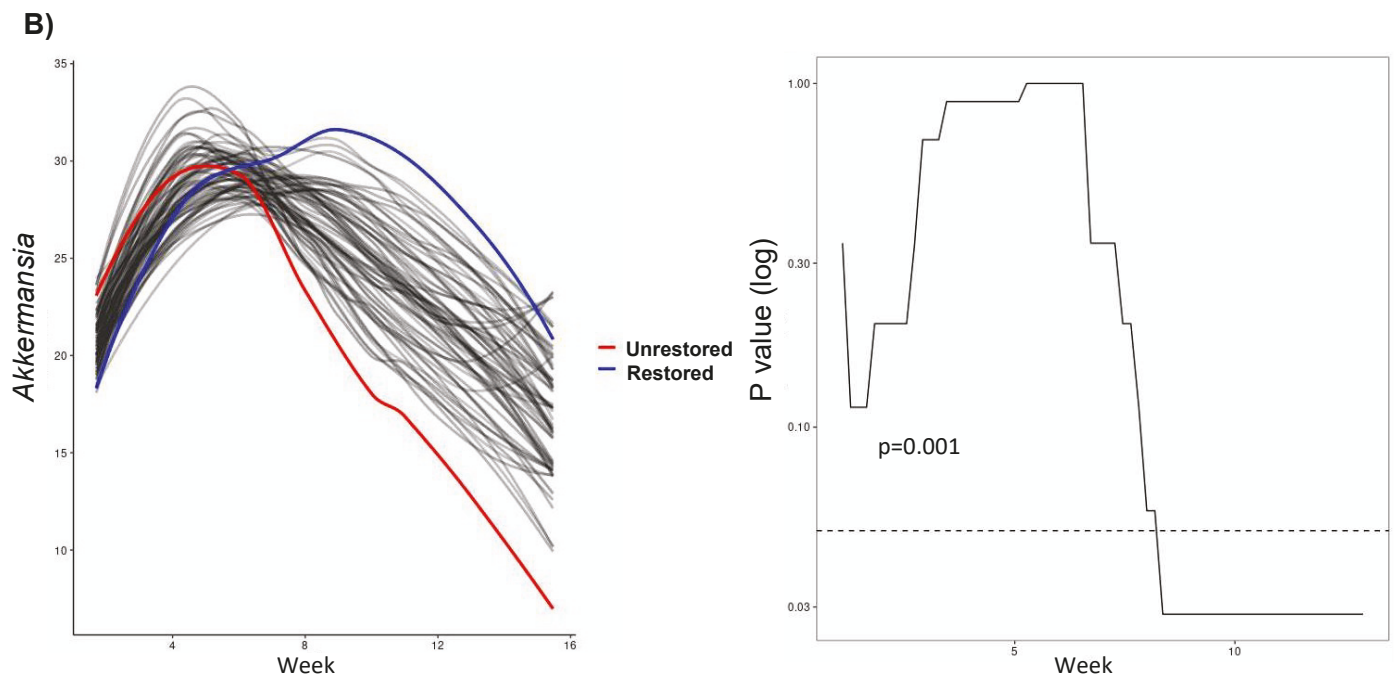

## Supplementary Figure S1C

C)

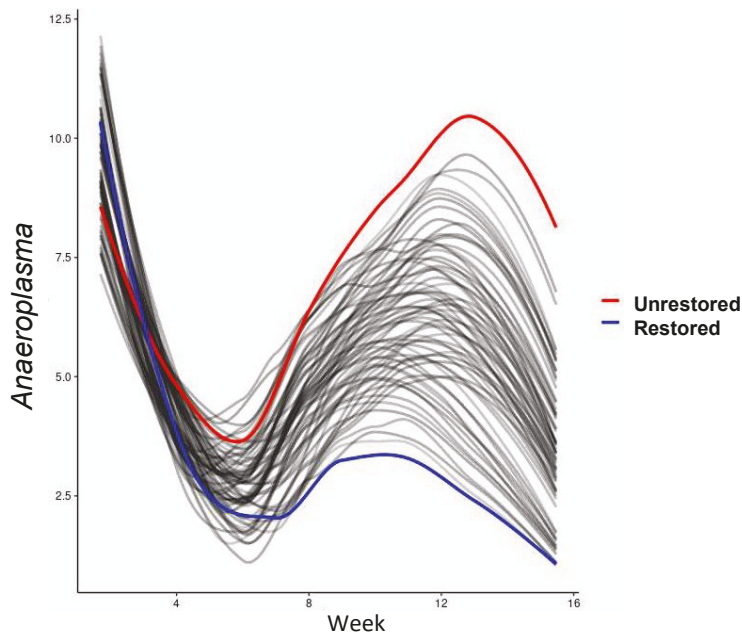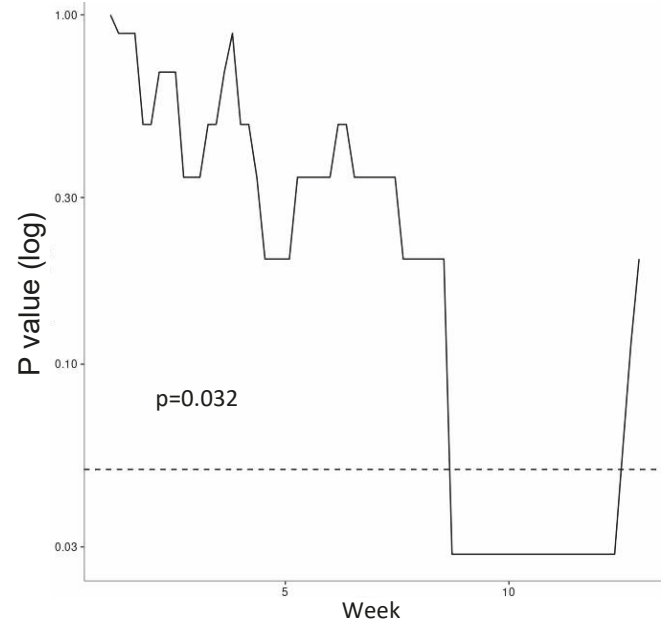

## Supplementary Figure S1D

D)

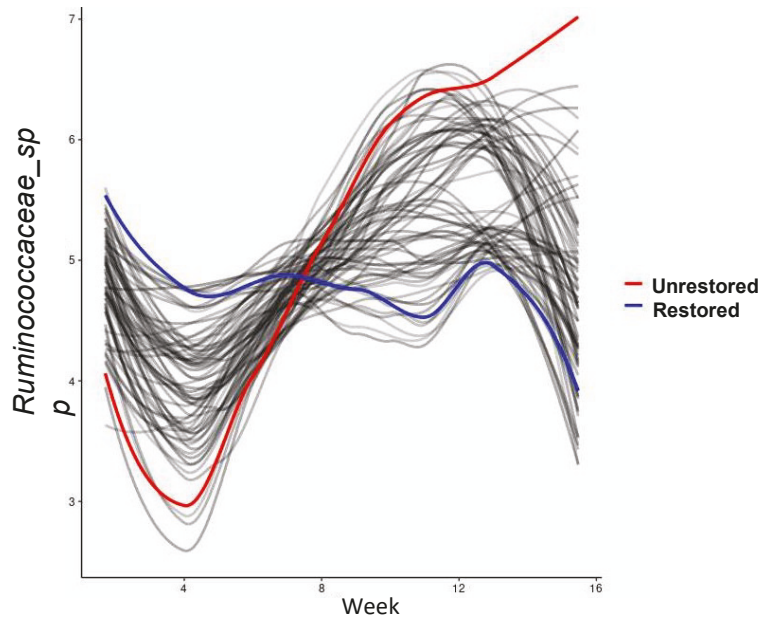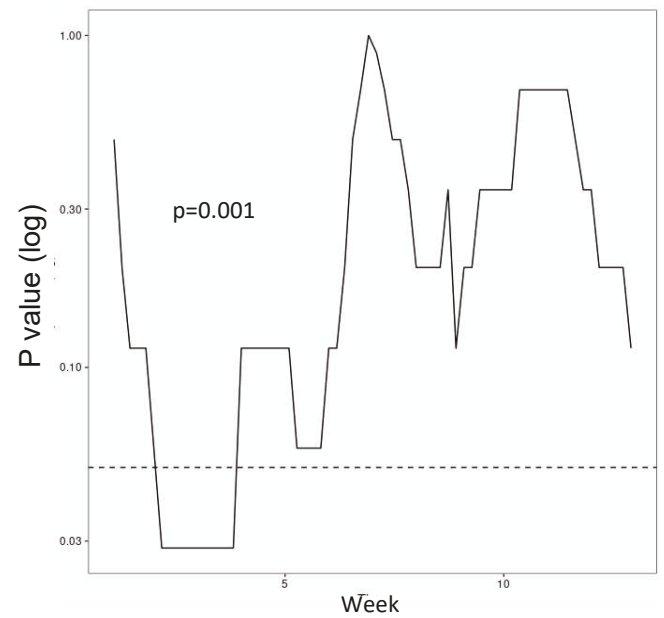

**Supplementary Figure S1E**

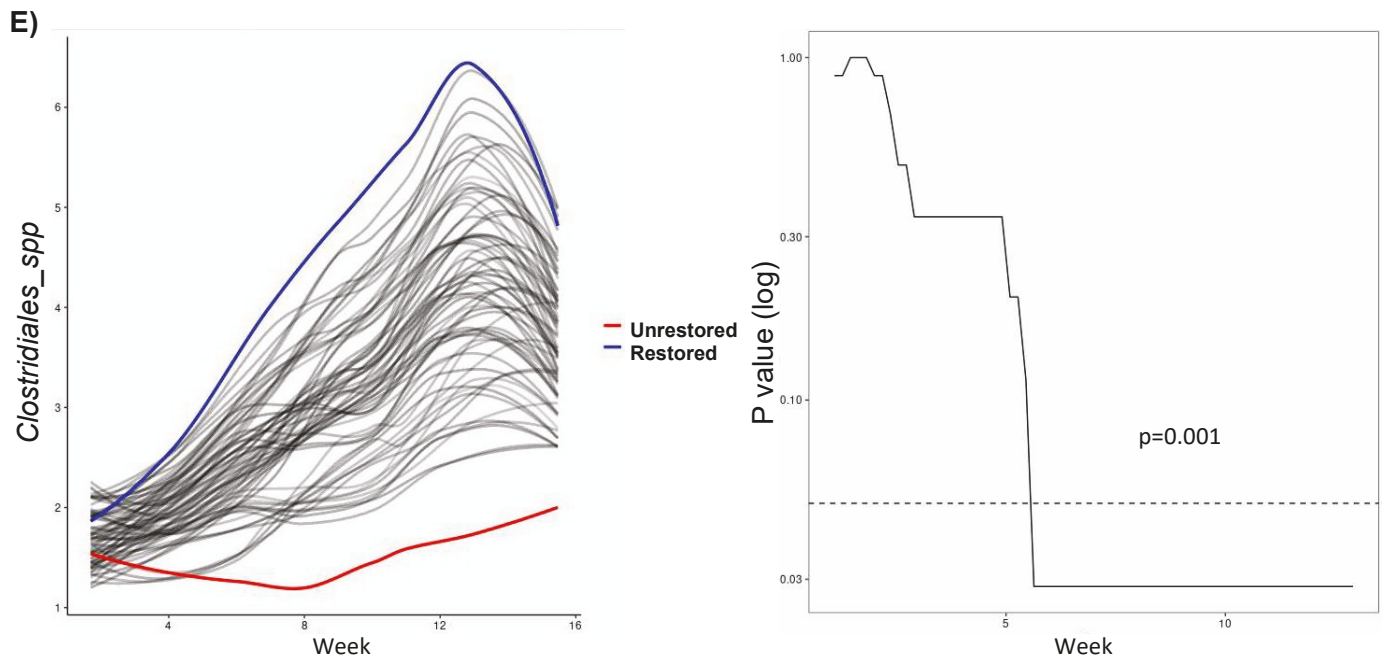

**Supplementary Figure S1F**

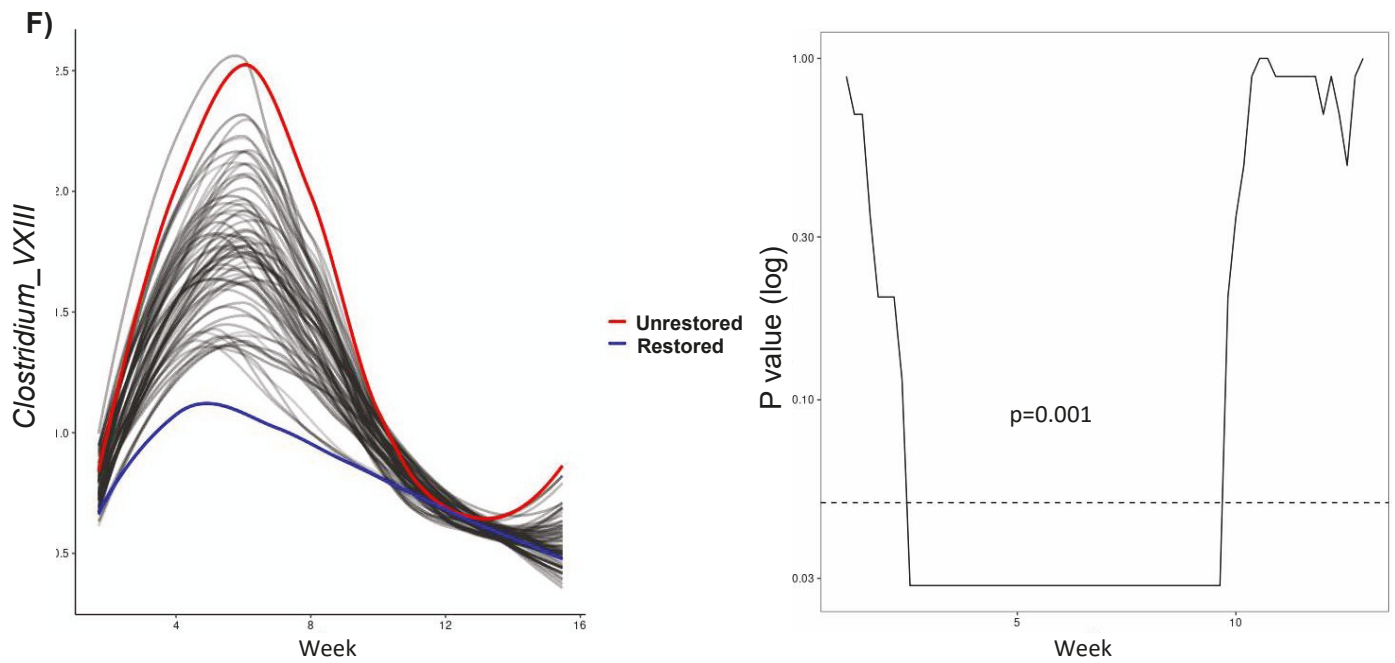

Supplementary Figure S1G

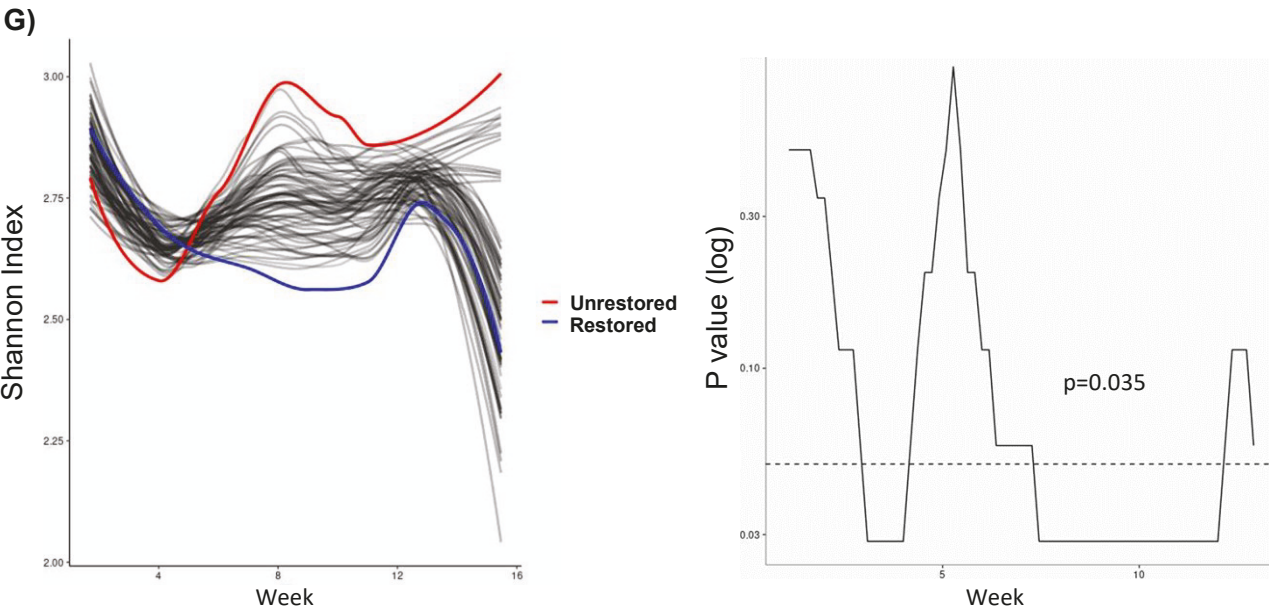

SF 1G

Supplementary Figure S2

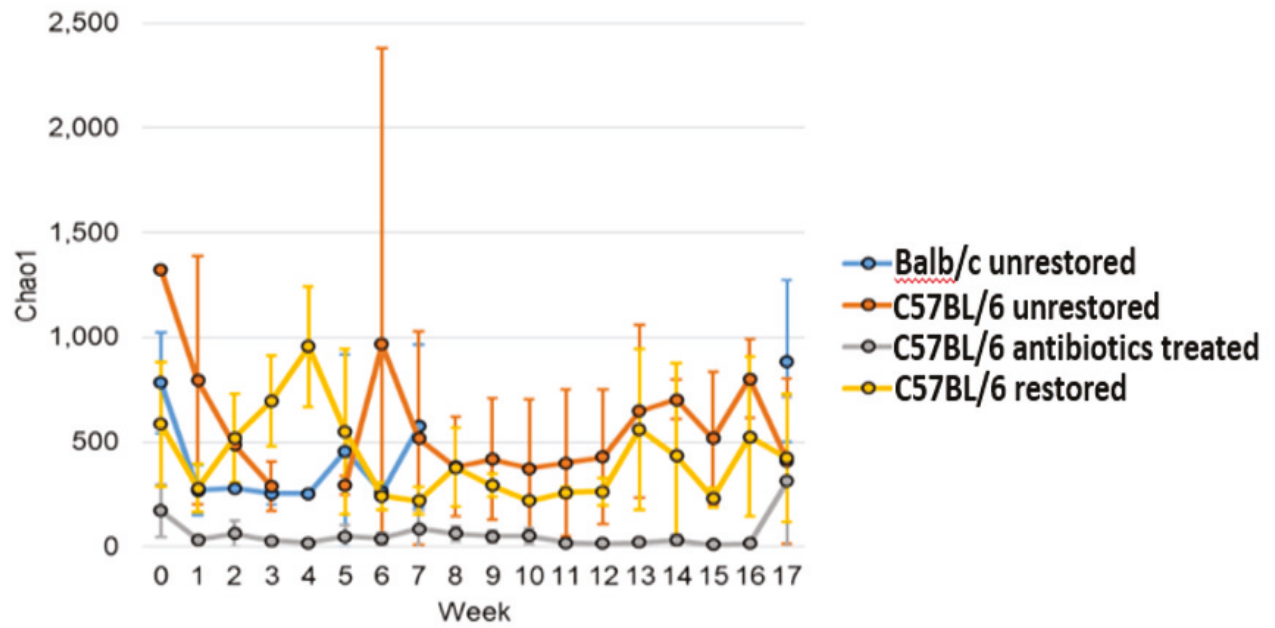

Supplementary Figure S3A

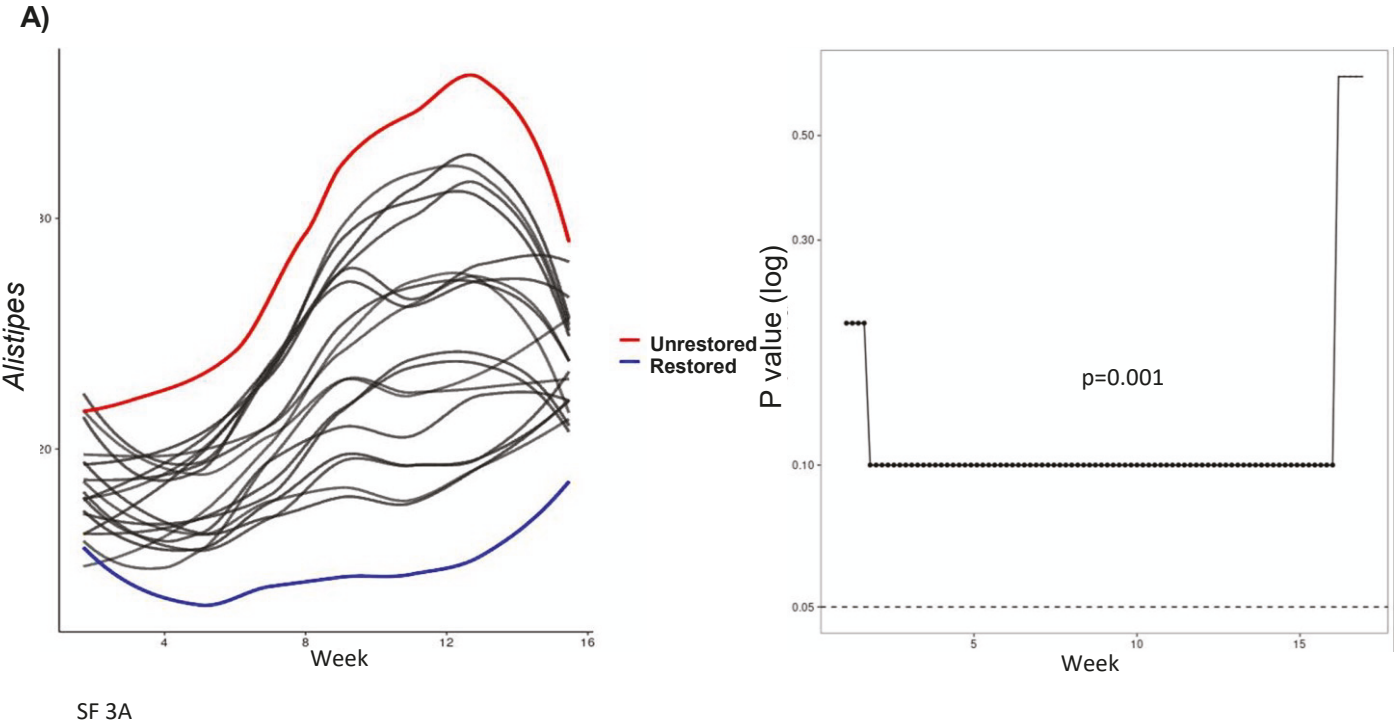

Supplementary Figure S3B

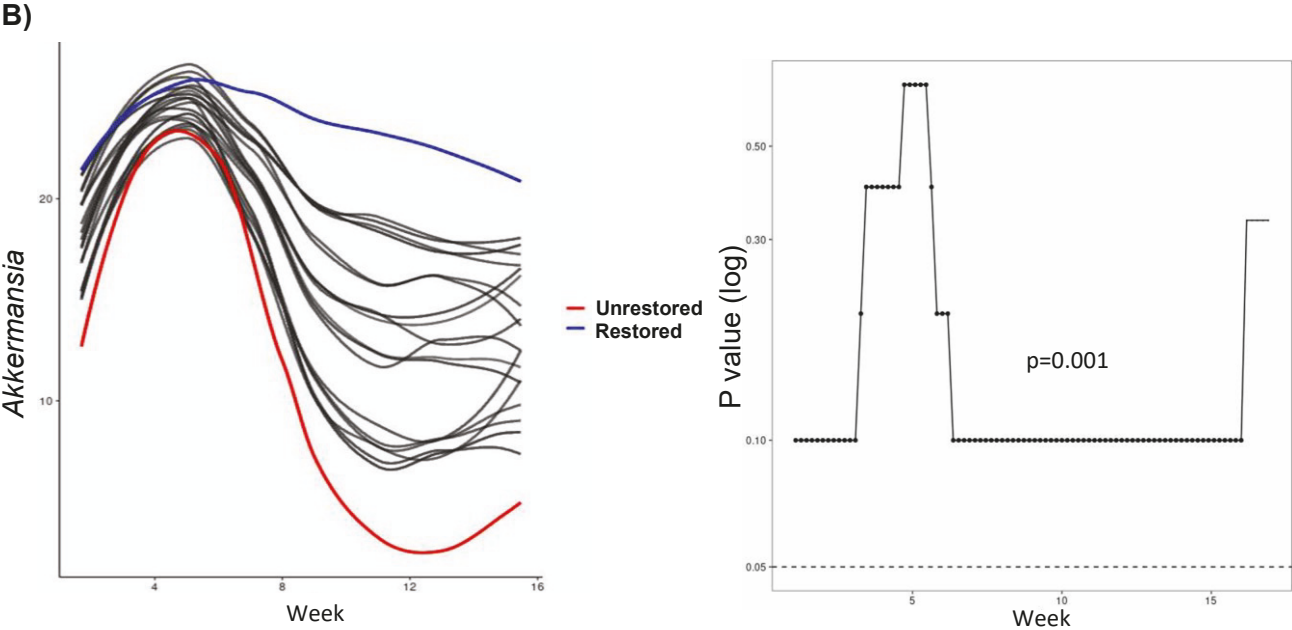



Supplementary Figure S3C

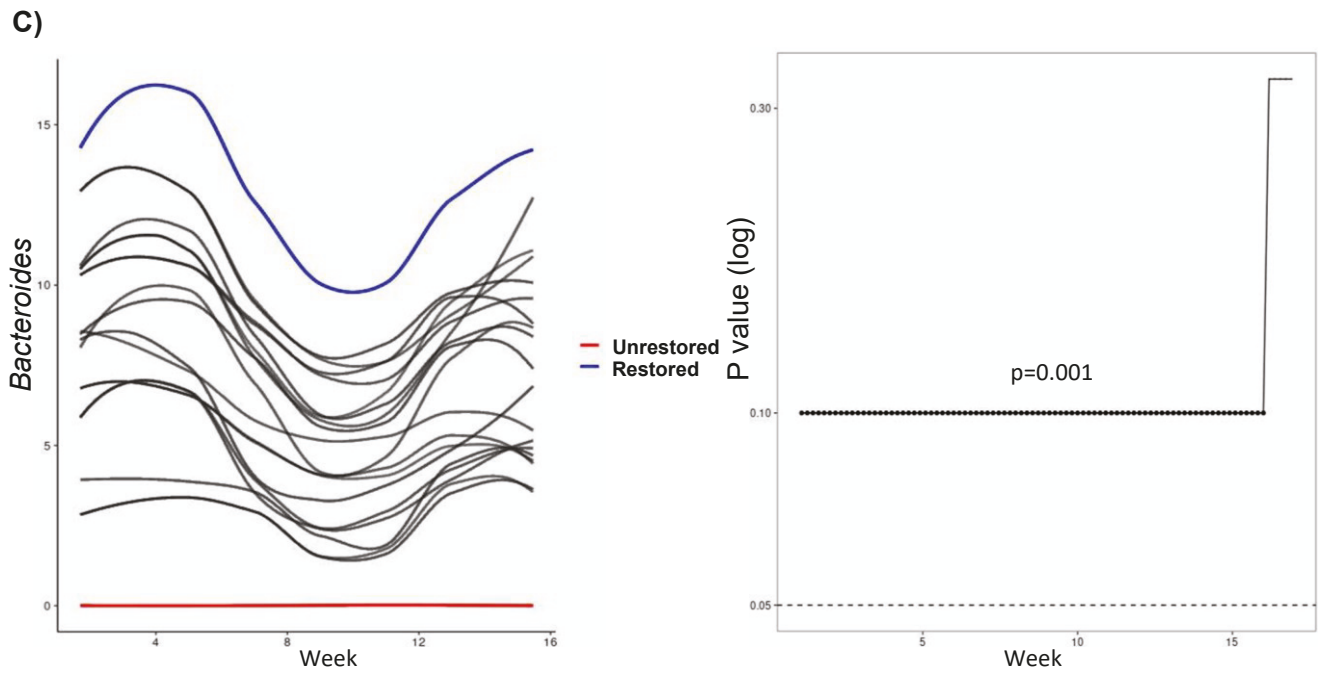

Supplementary Figure S3D

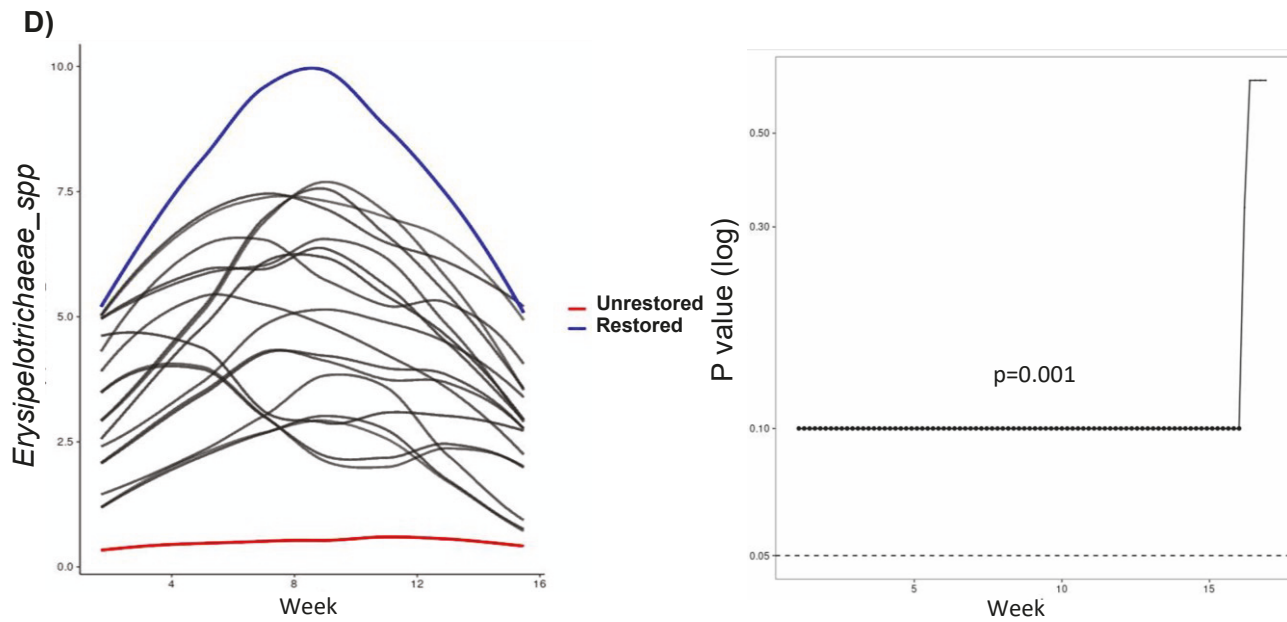



Supplementary Figure S3E

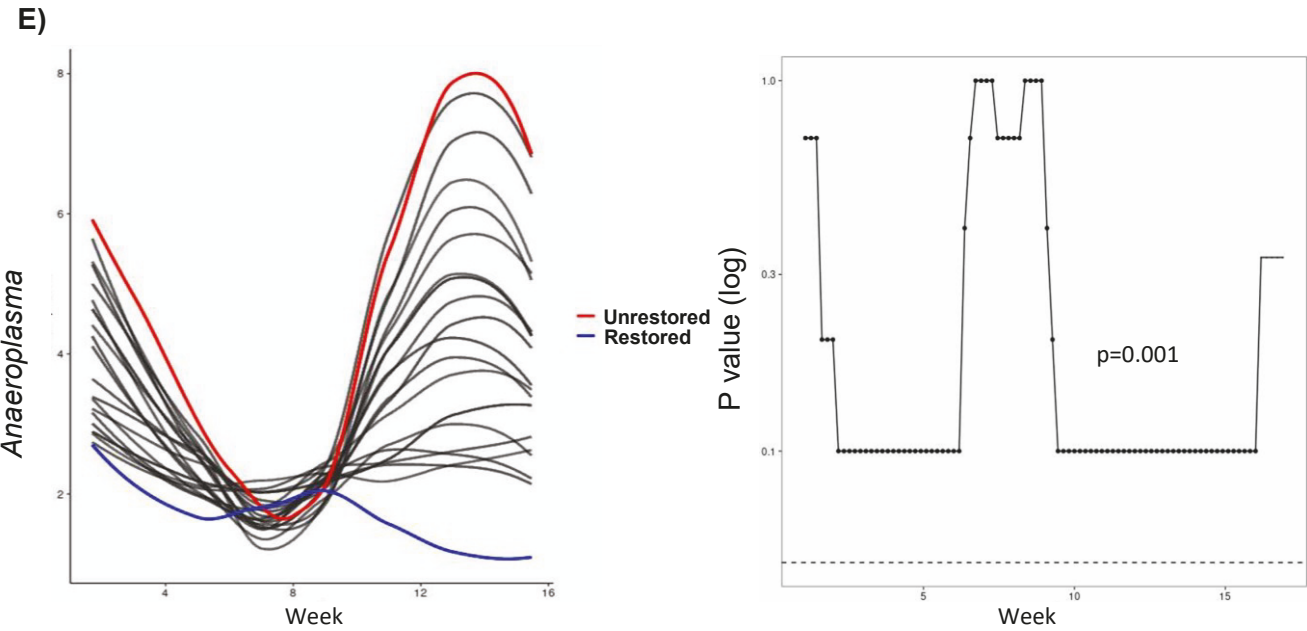

Supplement: s1 [file s1]
